# Supplementary material
Source: PubMed Central journal article supplement (PMC4251507)
Supplement: supp_2.4.E256_2014-0027_reporting_checklist.pdf [file supp_2.4.E256_2014-0027_reporting_checklist.pdf]

## STROBE Statement

|                              | Page No. | Recommendation                                                                                                                                                                                               |
|------------------------------|----------|--------------------------------------------------------------------------------------------------------------------------------------------------------------------------------------------------------------|
| <b>Title and abstract</b>    | 2        | (a) Indicate the study's design with a commonly used term in the title or the abstract                                                                                                                       |
|                              | 2        | (b) Provide in the abstract an informative and balanced summary of what was done and what was found                                                                                                          |
| <b>Introduction</b>          |          |                                                                                                                                                                                                              |
| Background/rationale         | 4-5      | Explain the scientific background and rationale for the investigation being reported                                                                                                                         |
| Objectives                   | 5        | State specific objectives, including any prespecified hypotheses                                                                                                                                             |
| <b>Methods</b>               |          |                                                                                                                                                                                                              |
| Study design                 | 5-6      | Present key elements of study design early in the paper                                                                                                                                                      |
| Setting                      | 5-6      | Describe the setting, locations, and relevant dates, including periods of recruitment, exposure, follow-up, and data collection                                                                              |
| Participants                 | 5-6      | (a) Give the eligibility criteria, and the sources and methods of selection of participants                                                                                                                  |
| Variables                    | 6-8      | Clearly define all outcomes, exposures, predictors, potential confounders, and effect modifiers. Give diagnostic criteria, if applicable                                                                     |
| Data sources/<br>measurement | 6-8      | For each variable of interest, give sources of data and details of methods of assessment (measurement). Describe comparability of assessment methods if there is more than one group                         |
| Bias                         | 7        | Describe any efforts to address potential sources of bias                                                                                                                                                    |
| Study size                   | 5-6      | Explain how the study size was arrived at                                                                                                                                                                    |
| Quantitative variables       | 7        | Explain how quantitative variables were handled in the analyses. If applicable, describe which groupings were chosen and why                                                                                 |
| Statistical methods          | 8        | (a) Describe all statistical methods, including those used to control for confounding                                                                                                                        |
|                              |          | (b) Describe any methods used to examine subgroups and interactions                                                                                                                                          |
|                              |          | (c) Explain how missing data were addressed                                                                                                                                                                  |
|                              |          | (d) If applicable, describe analytical methods taking account of sampling strategy                                                                                                                           |
|                              |          | (e) Describe any sensitivity analyses                                                                                                                                                                        |
| <b>Results</b>               |          |                                                                                                                                                                                                              |
| Participants                 | 9        | (a) Report numbers of individuals at each stage of study—eg numbers potentially eligible, examined for eligibility, confirmed eligible, included in the study, completing follow-up, and analysed            |
|                              |          | (b) Give reasons for non-participation at each stage                                                                                                                                                         |
|                              |          | (c) Consider use of a flow diagram                                                                                                                                                                           |
| Descriptive data             | 9        | (a) Give characteristics of study participants (eg demographic, clinical, social) and information on exposures and potential confounders                                                                     |
|                              |          | (b) Indicate number of participants with missing data for each variable of interest                                                                                                                          |
| Outcome data                 | 9        | Report numbers of outcome events or summary measures                                                                                                                                                         |
| Main results                 | 9-10     | (a) Give unadjusted estimates and, if applicable, confounder-adjusted estimates and their precision (eg, 95% confidence interval). Make clear which confounders were adjusted for and why they were included |
|                              |          | (b) Report category boundaries when continuous variables were categorized                                                                                                                                    |
|                              |          | (c) If relevant, consider translating estimates of relative risk into absolute risk for a meaningful time period                                                                                             |
| Other analyses               | 10-12    | Report other analyses done—eg analyses of subgroups and interactions, and sensitivity analyses                                                                                                               |

| <b>Discussion</b>        |       |                                                                                                                                                                            |
|--------------------------|-------|----------------------------------------------------------------------------------------------------------------------------------------------------------------------------|
| Key results              | 12    | Summarise key results with reference to study objectives                                                                                                                   |
| Limitations              | 13-14 | Discuss limitations of the study, taking into account sources of potential bias or imprecision. Discuss both direction and magnitude of any potential bias                 |
| Interpretation           | 14-15 | Give a cautious overall interpretation of results considering objectives, limitations, multiplicity of analyses, results from similar studies, and other relevant evidence |
| Generalisability         | 13    | Discuss the generalisability (external validity) of the study results                                                                                                      |
| <b>Other information</b> |       |                                                                                                                                                                            |
| Funding                  | 15    | Give the source of funding and the role of the funders for the present study and, if applicable, for the original study on which the present article is based              |

\*Give information separately for exposed and unexposed groups.
